# Supplementary material
Source: publisher figshare collection journal article supplement (https://acs.figshare.com/ndownloader/files/4281960)
Supplement: Supplementary file 1 [file 4281960]

**Figure S1.**

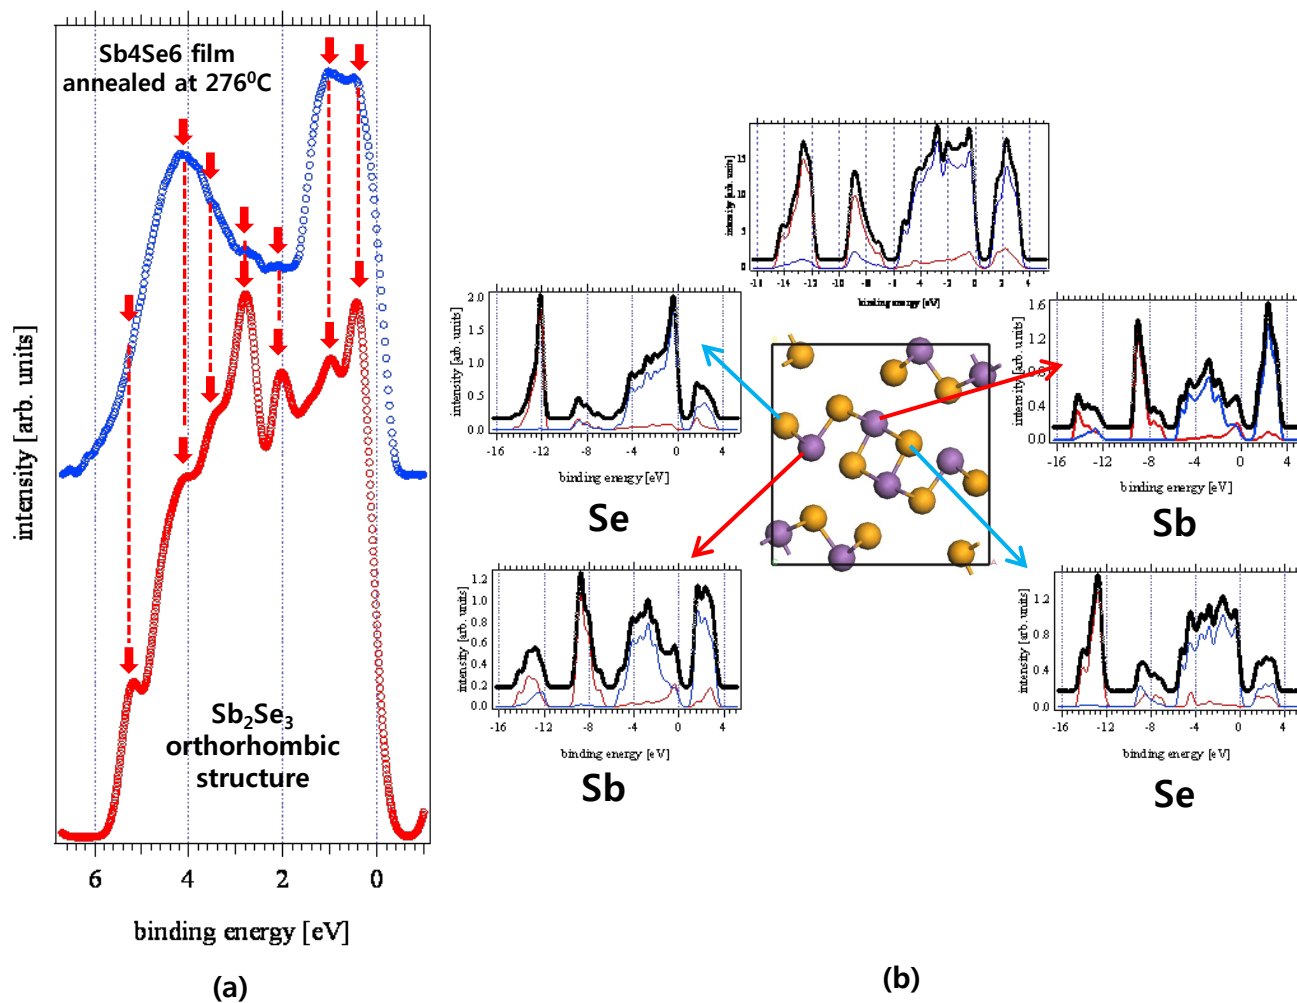

Figure S1. (a) Valence band spectrum of  $\text{Sb}_4\text{Se}_6$  film annealed at  $276^\circ\text{C}$  and  $\text{Sb}_2\text{Se}_3$  orthorhombic crystal structure calculated by DFT(density functional theory) . (b) PDOS(partial density of state) of each element in calculated  $\text{Sb}_2\text{Se}_3$  orthorhombic crystal structure (red curve: S orbital, blue curve: P orbital and black: total intensity)

**Figure S2.**

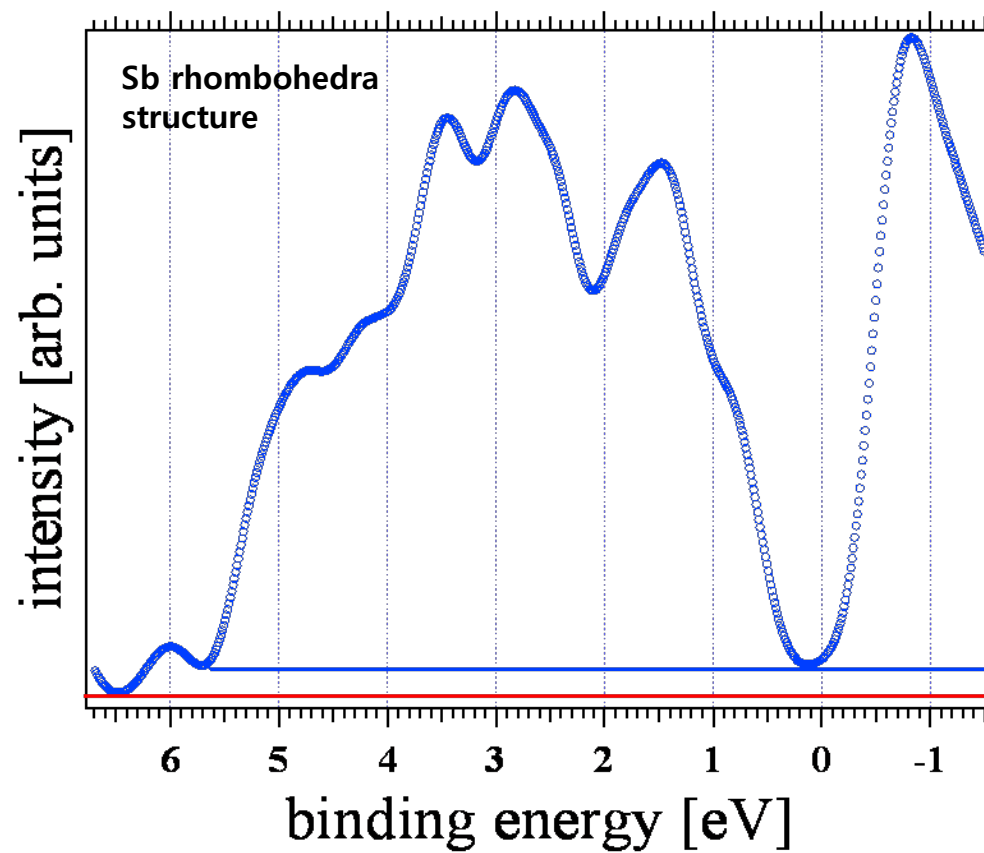

Figure S2. Valence band spectrum of Sb rhombohedra crystal structure calculated by DFT(density functional theory)

**Figure S3.**

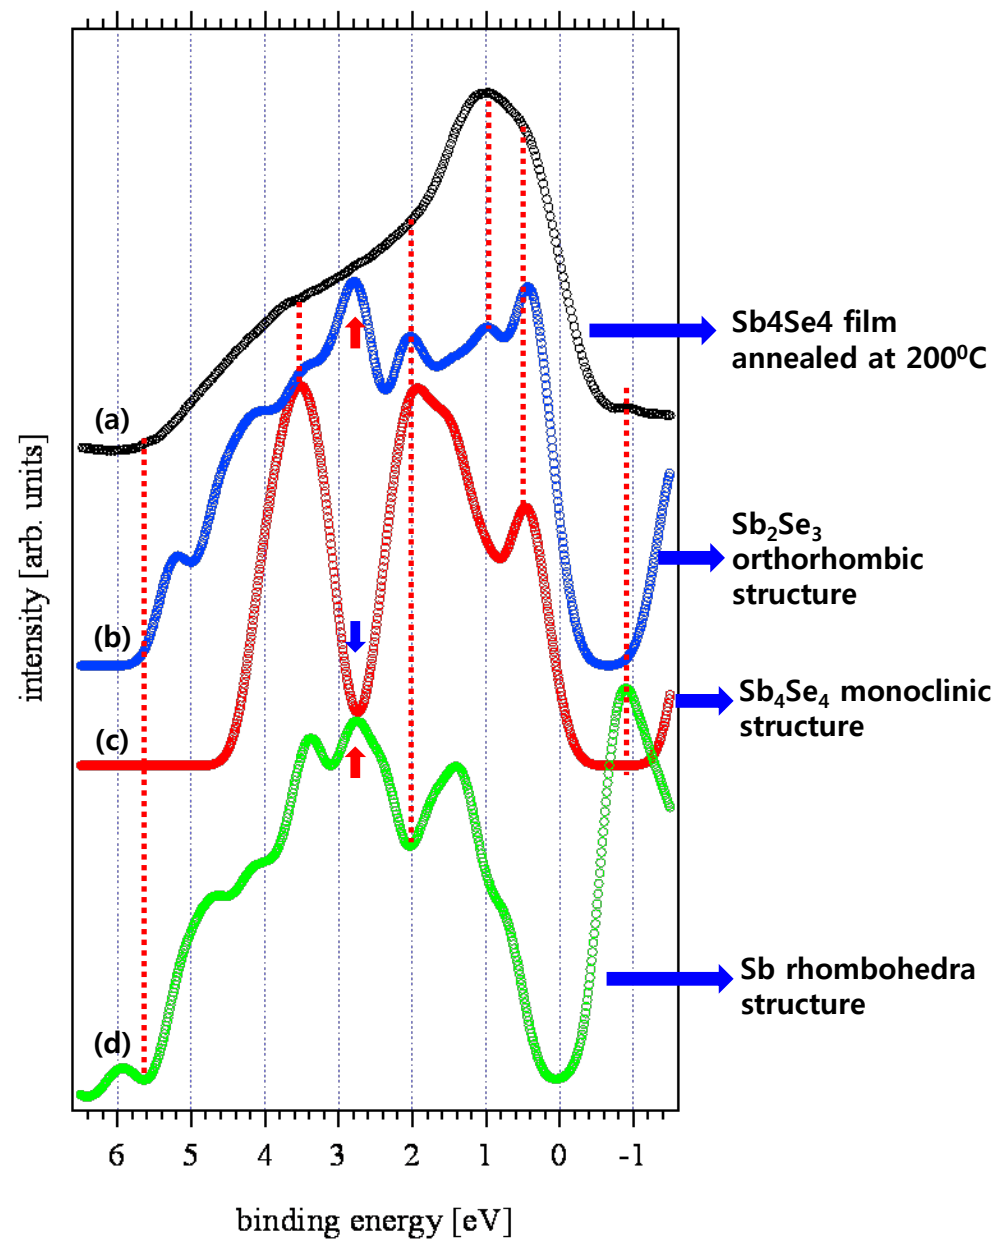

Figure S3. Valence band spectrum of (a) Sb<sub>4</sub>Se<sub>4</sub> film with Sb<sub>2</sub>Se<sub>3</sub> orthorhombic, Sb rhombohedra and Sb<sub>4</sub>Se<sub>4</sub> monoclinic crystal structure and (b) Sb<sub>2</sub>Se<sub>3</sub> orthorhombic, (c) Sb<sub>4</sub>Se<sub>4</sub> monoclinic and (d) Sb rhombohedra crystal structure calculated by DFT(density functional theory).
